# Supplementary material for: Global Transcriptional Profiling of Granulosa Cells from Polycystic Ovary Syndrome Patients: Comparative Analyses of Patients with or without History of Ovarian Hyperstimulation Syndrome Reveals Distinct Biomarkers and Pathways
Source: MDPI journal article supplement (doi:10.3390/jcm11236941), 2022-11-25
Supplement: s1 [file s1]

Table S1: The sequences of 21 primers (forward and reverse) employing B-ACTIN as the endogenous control gene.

| Gene      | PRIMERS (5'-3') |                             | Lengt<br>h | Tm<br>(°C) | Location  | Size<br>(bp) | Conc.<br>μM |
|-----------|-----------------|-----------------------------|------------|------------|-----------|--------------|-------------|
| B-ACTIN   | F               | CACCACACCTTCTACAATGAGC      | 22         | 60.0       |           | 157          | 100         |
|           | R               | CACAGCCTGGATAGCAACG         | 19         | 60.0       |           |              |             |
| FOXO1-1   | F               | AAGAGCGTGCCCTACTTCAA        | 20         | 60.02      | 639-661   | 157          | 100         |
|           | R               | CACCCTCTGGATTGAGCATC        | 20         | 60.62      | 806-787   |              |             |
| FOXO3     | F               | ACAAACGGCTCACTCTGTCC        | 20         | 60.31      | 521-539   | 168          | 100         |
|           | R               | TCTTGCCAGTTCCCTCATTC        | 20         | 60.20      | 670-650   |              |             |
| FOXOP1    | F               | TCCCCTCTGGGCAACTTAG         | 20         | 60.25      | 1-22      | 164          | 100         |
|           | R               | CTTCAGCTTCCTCTGGATCG        | 20         | 60.09      | 49-28     |              |             |
| IL33-1    | F               | CAAAGAAGTTTGCCCCATGT        | 20         | 59.97      | 60-80     | 180          | 100         |
|           | R               | AAGGCAAAGCACTCCACAGT        | 20         | 59.91      | 147-125   |              |             |
| PAPPA-1   | F               | ACAAAGACCCACGCTACTTTTT      | 22         | 60.4       | 494-515   | 131          | 100         |
|           | R               | CATGAACTGCCATCATAGGTG       | 22         | 60.8       | 624-603   |              |             |
| INSR-2    | F               | CATCCGGGGATCACGACTG         | 19         | 61.9       | 324-342   | 45           | 100         |
|           | R               | AAGATGACCAGCGCGTAGTTA       | 21         | 61.3       | 368-348   |              |             |
| GPC4-2    | F               | GTCAGCGAACAGTGCAATCAT       | 21         | 61.2       | 259-279   | 206          | 100         |
|           | R               | ACATTTCCCACCACGTAGTAAC      | 22         | 60.0       | 464-443   |              |             |
| GPSM1-1   | F               | GGAGCCGGGCCTATCTCTAAA       | 21         | 62.9       | 1725-1745 | 119          | 100         |
|           | R               | CTCTTGCTGCCAGTAAGCATC       | 21         | 61.0       | 1843-1823 |              |             |
| KLF2-2    | F               | CTACACCAAGAGTTCGCATCTG      | 22         | 60.7       | 846-867   | 137          | 100         |
|           | R               | CCGTGTGCTTTCGGTAGTG         | 19         | 60.7       | 982-964   |              |             |
| MAN2B2-1  | F               | ACGCCGCCAATGTCTACAC         | 19         | 62.7       | 155-173   | 92           | 100         |
|           | R               | CAGCCGGA AAAACTCCTGCT       | 20         | 62.7       | 246-227   |              |             |
| MYO10-2   | F               | AAGTGGGGCAGGTAAAACCG        | 20         | 62.4       | 474-493   | 114          | 100         |
|           | R               | GCTCGTTCAACACAGGATGTC       | 21         | 61.2       | 587-567   |              |             |
| NAGA-1    | F               | TTCCGCTGCAACATTAAGTGT       | 21         | 60.5       | 106-126   | 121          | 100         |
|           | R               | TGAGGTATGTGTAGCCCATGTC      | 22         | 61.2       | 226-205   |              |             |
| PCSK5-1   | F               | CCAACCACTGGGCAGTCAAA        | 20         | 62.6       | 107-126   | 144          | 100         |
|           | R               | CTGACCTTTTAATCGTCCTGCT      | 22         | 60.0       | 250-229   |              |             |
| PHEX-2    | F               | AAGTCTCCAAGCTAAACAGGAG<br>T | 23         | 60.9       | 135-157   | 119          | 100         |
|           | R               | AAGCGAACCGGAAGAAATTATC<br>A | 23         | 60.3       | 253-231   |              |             |
| PLD2-1    | F               | CAGATGGAGTCCGATGAGGTG       | 21         | 61.7       | 61-81     | 173          | 100         |
|           | R               | CCGCTGGTATATCTTTCGGTG       | 21         | 60.3       | 233-213   |              |             |
| RABGAP1-1 | F               | ACAGGACTCAAGATTGTAGGGA<br>A | 23         | 60.4       | 139-161   | 90           | 100         |
|           | R               | CTGGTCGTCCATTGGAGGA         | 19         | 60.7       | 228-210   |              |             |
| SIN3A-1   | F               | ACCATGCAGTCAGCTACGG         | 19         | 61.7       | 139-157   | 135          | 100         |
|           | R               | CACCGCTGTTGGGTGATGA         | 19         | 62.3       | 273-255   |              |             |

|          |   |                        |    |      |         |     |     |
|----------|---|------------------------|----|------|---------|-----|-----|
| SQSTM1-2 | F | TGCCCAGACTACGACTTGTG   | 20 | 61.5 | 181-200 | 145 | 100 |
|          | R | AGTGTCCGTGTTTCACCTTCC  | 21 | 62.2 | 325-305 |     |     |
| TCF7L2-2 | F | TCCTCGGCAGAGAGGGATTTA  | 21 | 61.9 | 103-123 | 127 | 100 |
|          | R | CTCGGAAACTTTCGGAGCGA   | 20 | 62.2 | 229-210 |     |     |
| USPX-1   | F | TCGGAGGGAATGACAACCAG   | 20 | 61.2 | 29-48   | 112 | 100 |
|          | R | GGAGTTGCCGGGGAATTTTCA  | 21 | 62.9 | 140-120 |     |     |
| ZFP36    | F | GACTGAGCTATGTCGGACCTT  | 21 | 61.0 | 315-335 | 124 | 100 |
|          | R | GAGTTCCGTCTTGTATTTGGGG | 22 | 60.6 | 438-417 |     |     |
